# Supplementary material for: Probing the periphery of dendrimers by heterogeneous electron transfer
Source: Royal Society of Chemistry journal article supplement (doi:10.1039/b614236b), 2007-01-01
Supplement: b614236b.pdf [file b614236b.pdf]

### Supporting Information for:

## Probing the periphery of dendrimers by heterogeneous electron transfer

K. Krishnamoorthy, Raghunath Reddy Dasari, Arpornrat Nantalaksakul and  
S. Thayumanavan\*

Department of Chemistry, University of Massachusetts, Amherst-01003, USA.

### Microelectrode fabrication

A 25  $\mu\text{m}$  diameter Pt wire was inserted into a one side sealed glass capillary. Then the glass was melted to seal the wire. Silver paint was used to make a contact between the Pt and a copper wire. Finally, the glass tip was polished using sand papers to expose the Pt disk. A smooth and clean Pt disk was obtained by polishing the electrode successively in 300 nm and 50 nm alumina powder. The electrode cleanliness was checked by recording a CV using ferrocene as analyte.

### Calculation of $D_0$ and $k^0$

The  $D_0$  for diarylaminopyrene was determined by following the reported procedure.<sup>1</sup> Microelectrode was used to record chronoamperometry at short times and steady state voltammetry. The slope from the plot of the ratio of current in chronoamperometry and steady state current vs  $1/t^{1/2}$  was used to calculate  $D_0$  using the following relation.

$$i_d(t)/i_{d,ss} = 0.7854 + (\pi^{1/2}/4)a(Dt)^{-1/2} \text{ ----- (1)}$$

The  $D_0$  was used in the steady state equation given below to obtain “n”

$$i = 4nFADC \text{ ----- (2)}$$

$i$  = Steady state current

$n$  = Number of electrons transferred

$F$  = Faraday constant

$A$  = Radius of the electrode

$D$  = Diffusion coefficient

$C$  = Concentration of the analyte

The  $k^0$  was calculated from the steady state voltammogram using reported procedure.<sup>2</sup>

The  $\Delta E_{1/4}$  ( $E_{1/4} - E_{1/2}$ ) and  $\Delta E_{3/4}$  ( $E_{1/2} - E_{3/4}$ ) were obtained from quartile potentials  $E_{1/4}$ ,  $E_{1/2}$  and  $E_{3/4}$ .<sup>2</sup> These values were used to find out a dimensionless parameter  $\lambda$ . By substituting  $D_0$  and  $\lambda$  in equation 3 the  $k^0$  was obtained.

$$k^0 = D_0\lambda/a \text{ ----- (3)}$$

### References

- 1 G. Denuault, M. V. Mirkin and A. J. Bard, *J. Electroanal. Chem.*, 1991, **308**, 27.
- 2 M. V. Mirkin and A. J. Bard, *Anal. Chem.*, 1992, **64**, 2293.
